# Supplementary material for: Arsenic Exposure, Arsenic Metabolism, and Glycemia: Results from a Clinical Population in New York City
Source: MDPI journal article supplement (doi:10.3390/ijerph18073749), 2021-04-03
Supplement: s1 [file s1]

**Table S1.** Inclusion and exclusion criteria.

|           |                                                                                                                |
|-----------|----------------------------------------------------------------------------------------------------------------|
| <b>a.</b> | <b>Inclusion Criteria</b>                                                                                      |
| 1.        | Disordered Glucose Homeostasis                                                                                 |
| i.        | <u>Group A</u> : Prediabetes, A1c 5.7-6.4%                                                                     |
| ii.       | <u>Group B</u> :                                                                                               |
| 1.        | T2D A1c 6.5-7.9% without T2D medications                                                                       |
| 2.        | T2D A1c $\geq$ 8% with/without T2D medications                                                                 |
| 2.        | Control patients ( <u>Group C</u> ): Normal glucose homeostasis                                                |
| 3.        | Age $\geq$ 18                                                                                                  |
| 4.        | No known cardiovascular, cerebrovascular or peripheral arterial disease                                        |
| 5.        | Able and willing to provide written informed consent for the study                                             |
| <b>b.</b> | <b>Exclusion Criteria</b>                                                                                      |
| 1.        | Unable to speak Spanish or English                                                                             |
| 2.        | Active smoking (within the past year)                                                                          |
| 3.        | Autoimmune, rheumatologic or inflammatory disease                                                              |
| 4.        | Known active cancer receiving treatment                                                                        |
| 5.        | Pregnancy                                                                                                      |
| 6.        | Anemia (hemoglobin < 9 mg/dl)                                                                                  |
| 7.        | Chronic kidney disease (CrCl < 30ml/min)                                                                       |
| 8.        | Known Coronary Artery Disease (CAD; prior stents or CABG)                                                      |
| 9.        | Congestive Heart Failure                                                                                       |
| 10.       | Known Peripheral Arterial Disease (PAD; lower extremity revascularization surgery OR lower extremity stenting) |
| 11.       | Known prior stroke or TIA (mini-stroke or temporary/transient stroke)                                          |

**Table S2.** Reasons for lack of participation or ineligibility.

|                                                                                    |             |
|------------------------------------------------------------------------------------|-------------|
| <b>Pre-screened and eligible</b>                                                   | <b>2411</b> |
| No-show, cancelled clinic appointment, or missed patient at clinic                 | 1024        |
| Other                                                                              | 211         |
| Declined participation via phone                                                   | 209         |
| <b>Patient approached in person at clinic appointment</b>                          | <b>967</b>  |
| Ineligible at time of approach                                                     | 60          |
| Unable to contact after first approach                                             | 419         |
| Declined to participate                                                            | 249         |
| Other                                                                              | 25          |
| <b>Patient scheduled study appointment</b>                                         | <b>423</b>  |
| Cancelled, no show for study appointment, screen failure, or incomplete urinalysis | 233         |
| <b>Accrued</b>                                                                     | <b>190</b>  |
| Subjects with incomplete metals data                                               | 44          |
| <b>Subjects used for analysis</b>                                                  | <b>146</b>  |
